# Supplementary material for: Atomic perspective elucidates mixed alcohol synthesis from syngas on bilayered (K)/MoS 2 catalysts
Source: Royal Society of Chemistry journal article supplement (doi:10.1039/d5ra08871b), 2026-01-01
Supplement: d5ra08871b1.pdf [file d5ra08871b1.pdf]

## Supporting Information

### Atomic Perspective Elucidates Mixed Alcohol Synthesis from Syngas on Bilayered (K)/MoS<sub>2</sub> Catalysts

Yaru Dang<sup>a</sup>, Qianji Han<sup>a\*</sup>, Ruihan Wang<sup>a</sup>, Ziyang Wei<sup>a</sup>, Meng Wang<sup>b</sup> and Bin Qin<sup>c\*</sup>

<sup>a</sup>. Chemical Engineering College, Hebei Normal University of Science and Technology, Qinhuangdao, 066600, China.

<sup>b</sup>. Department of Ecology, Hebei University of Environmental Engineering, Qinhuangdao, 0666102, China.

<sup>c</sup>. Key Laboratory of Advanced Energy Materials Chemistry of Ministry of Education, College of Chemistry, Nankai University, Tianjin 300071, China

#### Corresponding Author

\*E-mail: hanqianji4193@hevttc.edu.cn  
qinbin@nankai.edu.cn

For molybdenum sulfide based catalysts, we have constructed four-layer and two-layer stacking molybdenum sulfide models, drawing on the most widely accepted "Rim-Edge" model, and considered the effect of K doping on the adsorption of  $H_2$  and CO on both models. The results show that the higher the Rim-Edge content, the more favorable the activation of  $H_2$  molecules on the  $MoS_2(100)$  surface, that is, the bilayer stacked  $MoS_2(100)$  surface is more favorable for the activation of  $H_2$  molecules. K can promote the dissociative adsorption of  $H_2$  molecules, but at the same time occupy the sites for the dissociative adsorption of  $H_2$  molecules and relatively inhibit their adsorption. Besides, K can provide more sites for the adsorption of CO. These also indicates that the doping of K not only has electronic effects, but also directly affects the process of CO hydrogenation from the structure of the active phase.

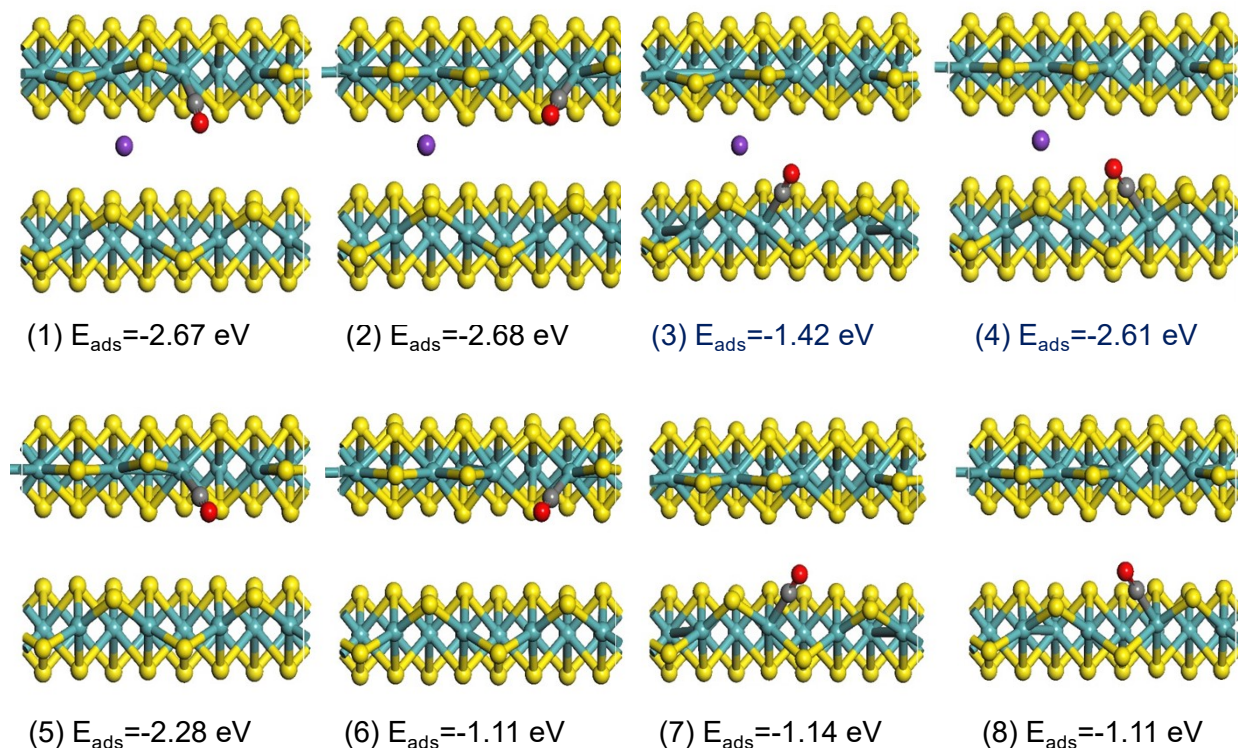

**Figure S1** CO adsorption on the Mo and the S edges of the (Kdoped)  $MoS_2(100)$  surfaces. The calculated CO adsorption energies are given for the undoped (below) and the K-doped (up)  $MoS_2(100)$  surfaces. The light green, yellow, purple, gray, and red balls represent Mo, S, K, C, and O atoms, respectively.

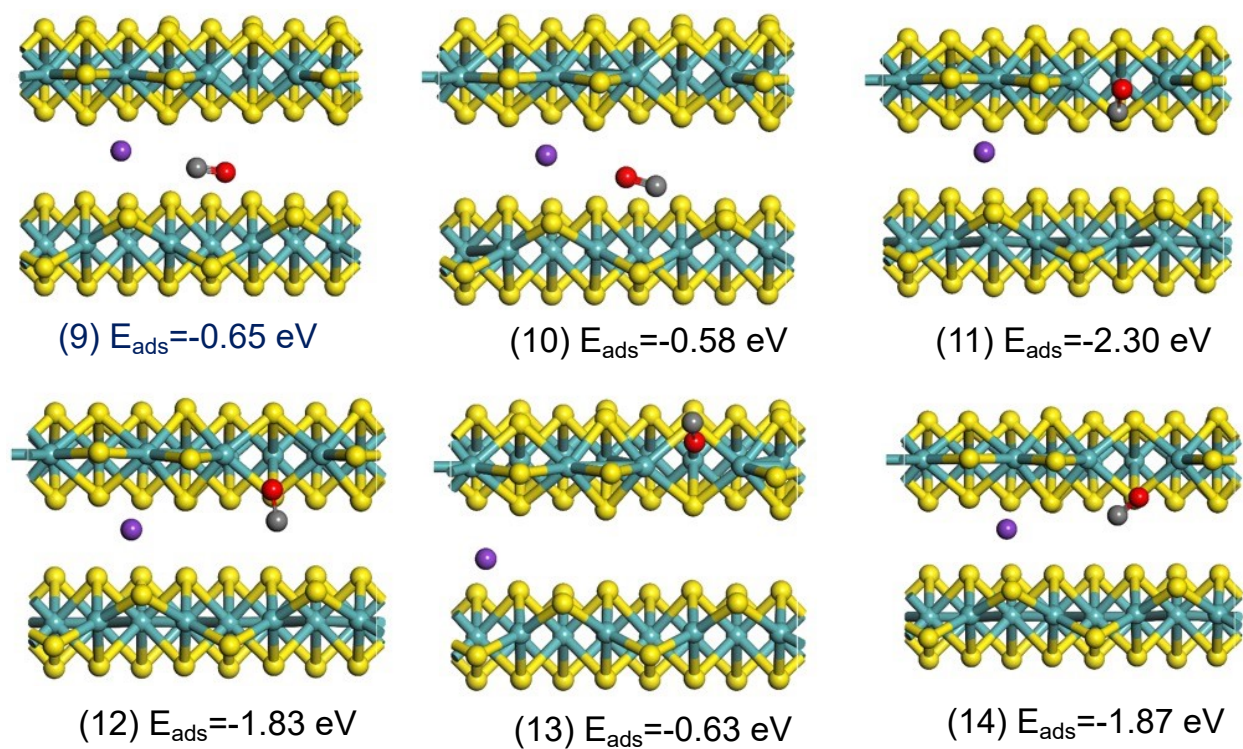

**Figure S2** CO adsorption on the Mo and the S edges of the K-doped  $\text{MoS}_2(100)$  surfaces. The calculated CO adsorption energies are given for the K-doped (up)  $\text{MoS}_2(100)$  surfaces. The light green, yellow, purple, gray, and red balls represent Mo, S, K, C, and O atoms, respectively.

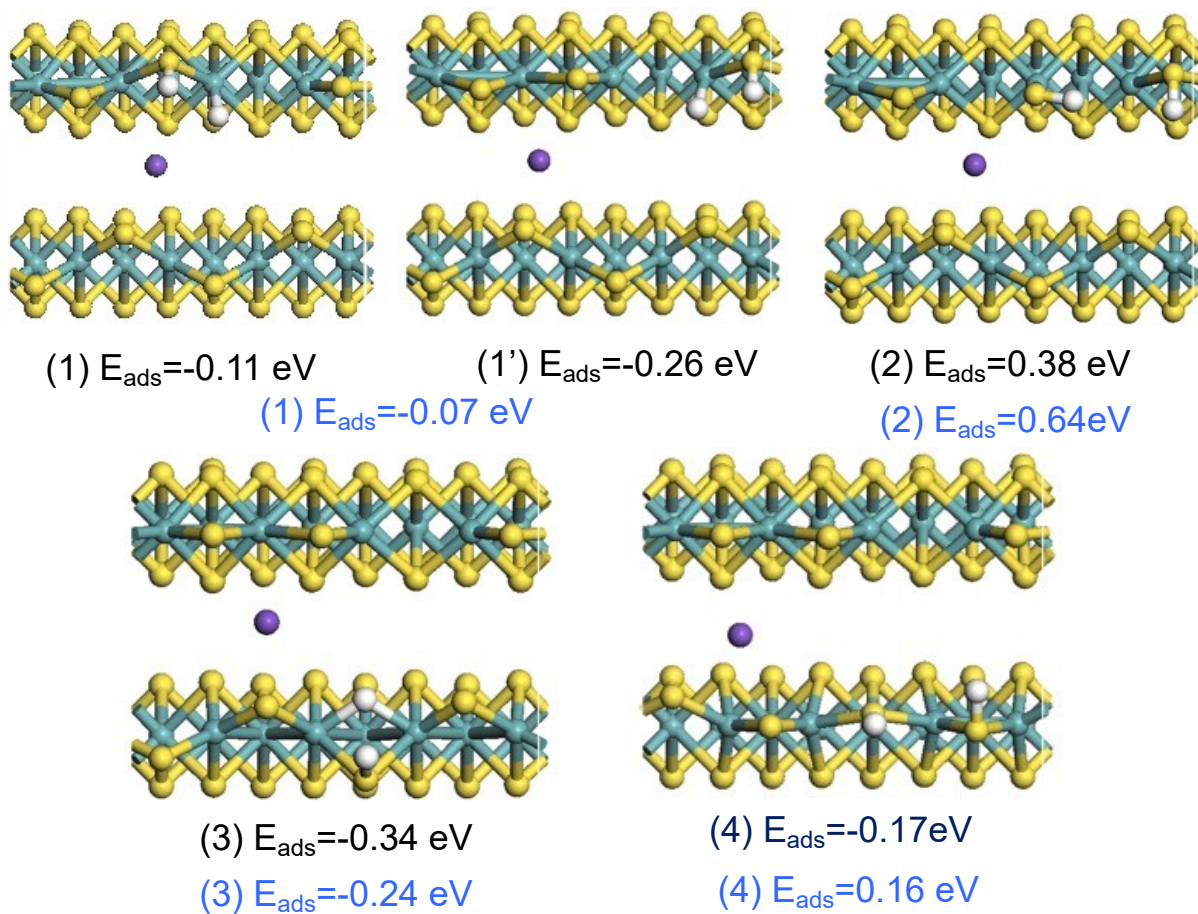

**Figure S3** The dissociative  $\text{H}_2$  adsorption on the Mo edge and the S edges of the (Kdoped)  $\text{MoS}_2(100)$  surfaces. The calculated adsorption energies relative to the gas phase molecular  $\text{H}_2$  are given for the K-doped M (in dark) and the undoped  $\text{MoS}_2(100)$  surfaces. The color scheme in Fig. 1 is applied. White balls represent H atoms.



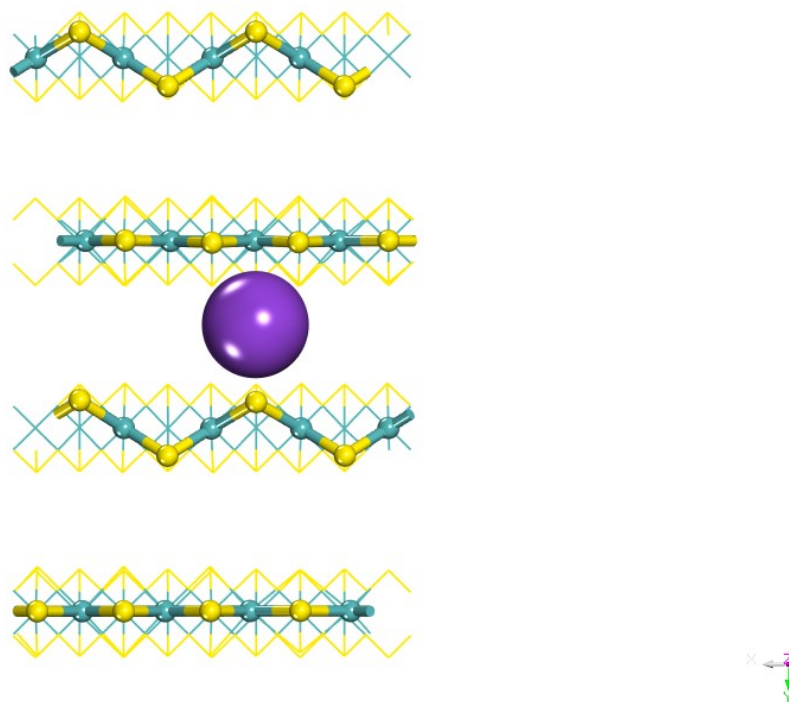

**Figure S4** The optimized structure of 4 layered K/MoS<sub>2</sub>(100).

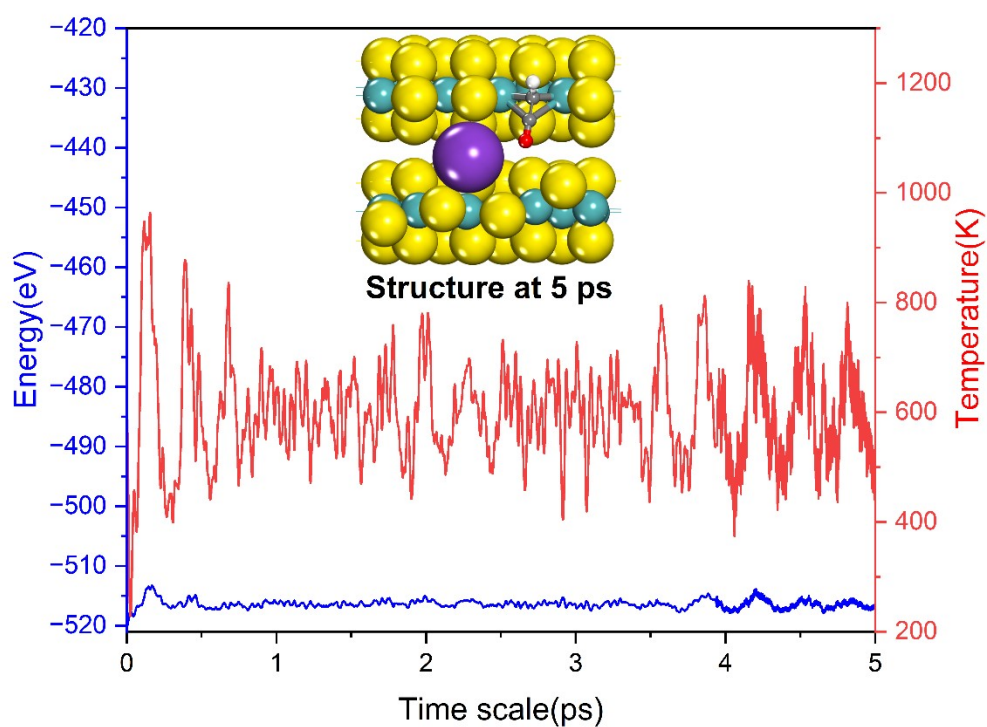

**Figure S5** Energy and temperature fluctuations from AIMD simulations at 600 K for a duration of 5 ps.

|                                   |                                                            |                                 |                                  |                                   |
|-----------------------------------|------------------------------------------------------------|---------------------------------|----------------------------------|-----------------------------------|
|                                   |                                                            |                                 |                                  |                                   |
| TS <sub>H-CO</sub>                | TS <sub>CO-H</sub>                                         | TS <sub>CHOH</sub>              | TS <sub>CH-OH</sub>              | TS <sub>CHOH-H</sub>              |
| f/i = 880.59 cm <sup>-1</sup>     | f/i = 556.40 cm <sup>-1</sup>                              | f/i = 193.64 cm <sup>-1</sup>   | f/i = 245.02 cm <sup>-1</sup>    | f/i = 825.71 cm <sup>-1</sup>     |
|                                   |                                                            |                                 |                                  |                                   |
| TS <sub>CH-H</sub>                | TS <sub>CH<sub>3</sub>-OH</sub>                            | TS <sub>CH<sub>2</sub>-OH</sub> | TS <sub>CH<sub>2</sub>-H</sub>   | TS <sub>CH<sub>3</sub>-OH</sub>   |
| f/i = 924.59 cm <sup>-1</sup>     | f/i = 608.85 cm <sup>-1</sup>                              | f/i = 485.54 cm <sup>-1</sup>   | f/i = 393.19 cm <sup>-1</sup>    | f/i = 558.83 cm <sup>-1</sup>     |
|                                   |                                                            |                                 |                                  |                                   |
| TS <sub>CH<sub>3</sub>-H</sub>    | TS <sub>CH<sub>3</sub>-OH</sub>                            | TS <sub>CH<sub>2</sub>-CO</sub> | TS <sub>CH<sub>2</sub>-CHO</sub> | TS <sub>CH<sub>3</sub>-CO-H</sub> |
| f/i = 621.85 cm <sup>-1</sup>     | f/i = 558.83 cm <sup>-1</sup>                              | f/i = 110.11 cm <sup>-1</sup>   | f/i = 191.48 cm <sup>-1</sup>    | f/i = 897.71 cm <sup>-1</sup>     |
|                                   |                                                            |                                 |                                  |                                   |
| TS <sub>CH<sub>2</sub>-COH</sub>  | TS <sub>CH<sub>2</sub>-CO-H</sub>                          | TS <sub>CH<sub>3</sub>-CO</sub> | TS <sub>CH<sub>3</sub>-COH</sub> | TS <sub>CH<sub>3</sub>-CHO</sub>  |
| f/i = 634.66 cm <sup>-1</sup>     | f/i = 654.21 cm <sup>-1</sup>                              | f/i = 400.49 cm <sup>-1</sup>   | f/i = 927.83 cm <sup>-1</sup>    | f/i = 501.93 cm <sup>-1</sup>     |
|                                   |                                                            |                                 |                                  |                                   |
| TS <sub>CH<sub>3</sub>-CHOH</sub> | TS <sub>CH<sub>3</sub>-CH&lt;sub&gt;2&lt;/sub&gt;-OH</sub> |                                 |                                  |                                   |
| f/i = 891.94 cm <sup>-1</sup>     | f/i = 544.88 cm <sup>-1</sup>                              |                                 |                                  |                                   |

**Figure S6** The structures of all transition state (TS) on Mo@MoS<sub>2</sub>(100) site with the related frequency data.

|                                |                                 |                                |                                 |                                 |
|--------------------------------|---------------------------------|--------------------------------|---------------------------------|---------------------------------|
|                                |                                 |                                |                                 |                                 |
| TS <sub>H-CO</sub>             | TS <sub>CO-H</sub>              | TS <sub>CH-O</sub>             | TS <sub>CHOH</sub>              | TS <sub>H<sub>2</sub>CO</sub>   |
| f/i = 621.85 cm <sup>-1</sup>  | f/i = 932.39 cm <sup>-1</sup>   | f/i = 189.21 cm <sup>-1</sup>  | f/i = 851.74 cm <sup>-1</sup>   | f/i = 459.99 cm <sup>-1</sup>   |
|                                |                                 |                                |                                 |                                 |
| TS <sub>CH-OH</sub>            | TS <sub>CH<sub>2</sub>-O</sub>  | TS <sub>CH<sub>2</sub>OH</sub> | TS <sub>H<sub>3</sub>CO</sub>   | TS <sub>CH<sub>2</sub>-OH</sub> |
| f/i = 346.02 cm <sup>-1</sup>  | f/i = 422.33 cm <sup>-1</sup>   | f/i = 1045.39 cm <sup>-1</sup> | f/i = 774.71 cm <sup>-1</sup>   | f/i = 364.94 cm <sup>-1</sup>   |
|                                |                                 |                                |                                 |                                 |
| TS <sub>CH<sub>3</sub>-O</sub> | TS <sub>H<sub>3</sub>CO-H</sub> | TS <sub>CH<sub>3</sub>OH</sub> | TS <sub>CH<sub>3</sub>-OH</sub> | TS <sub>CH<sub>2</sub>-H</sub>  |
| f/i = 523.07 cm <sup>-1</sup>  | f/i = 967.74 cm <sup>-1</sup>   | f/i = 388.77 cm <sup>-1</sup>  | f/i = 335.54 cm <sup>-1</sup>   | f/i = 401.23 cm <sup>-1</sup>   |
|                                |                                 |                                |                                 |                                 |
| TS <sub>CH<sub>3</sub>-H</sub> |                                 |                                |                                 |                                 |
| f/i = 341.84 cm <sup>-1</sup>  |                                 |                                |                                 |                                 |

**Figure S7** The structures of all transition state (TS) on S@MoS<sub>2</sub>(100) site with the related frequency data.



|                                                                                     |                                                                                     |                                                                                     |                                                                                      |                                                                                       |
|-------------------------------------------------------------------------------------|-------------------------------------------------------------------------------------|-------------------------------------------------------------------------------------|--------------------------------------------------------------------------------------|---------------------------------------------------------------------------------------|
| 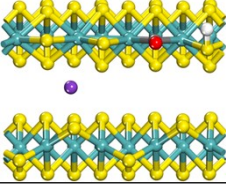   |    |    |    |    |
| TS <sub>H-CO</sub>                                                                  | TS <sub>CO-H</sub>                                                                  | TS <sub>CHO-H</sub>                                                                 | TS <sub>CH-O</sub>                                                                   | TS <sub>H2CO</sub>                                                                    |
| f/i = 166.49 cm <sup>-1</sup>                                                       | f/i = 860.75 cm <sup>-1</sup>                                                       | f/i = 1009.69 cm <sup>-1</sup>                                                      | f/i = 407.92 cm <sup>-1</sup>                                                        | f/i = 497.61 cm <sup>-1</sup>                                                         |
|    |    |    |    |    |
| TS <sub>CH2-O</sub>                                                                 | TS <sub>CH-OH</sub>                                                                 | TS <sub>CH2OH</sub>                                                                 | TS <sub>CH2-OH</sub>                                                                 | TS <sub>CH-H</sub>                                                                    |
| f/i = 499.96 cm <sup>-1</sup>                                                       | f/i = 386.46 cm <sup>-1</sup>                                                       | f/i = 895.12 cm <sup>-1</sup>                                                       | f/i = 387.87 cm <sup>-1</sup>                                                        | f/i = 837.45 cm <sup>-1</sup>                                                         |
|    |    |    |    |    |
| TS <sub>CH2OH-H</sub>                                                               | TS <sub>CH3-OH</sub>                                                                | TS <sub>CH2-H</sub>                                                                 | TS <sub>CH3-H</sub>                                                                  | TS <sub>CH-CO</sub>                                                                   |
| f/i = 311.97 cm <sup>-1</sup>                                                       | f/i = 513.03 cm <sup>-1</sup>                                                       | f/i = 365.27 cm <sup>-1</sup>                                                       | f/i = 882.88 cm <sup>-1</sup>                                                        | f/i = 181.07 cm <sup>-1</sup>                                                         |
|  |  |  |  |  |
| TS <sub>CH-CHO</sub>                                                                | TS <sub>CHCO-H</sub>                                                                | TS <sub>CH2CO</sub>                                                                 | TS <sub>CHCH2O</sub>                                                                 | TS <sub>CH2CHO</sub>                                                                  |
| f/i = 509.27 cm <sup>-1</sup>                                                       | f/i = 535.72 cm <sup>-1</sup>                                                       | f/i = 602.68 cm <sup>-1</sup>                                                       | f/i = 915.40 cm <sup>-1</sup>                                                        | f/i = 329.23 cm <sup>-1</sup>                                                         |
|  |  |  |  |  |
| TS <sub>CH3CO</sub>                                                                 | TS <sub>CH2CH2O</sub>                                                               | TS <sub>CH3COH</sub>                                                                | TS <sub>CH3CO-H</sub>                                                                | TS <sub>CH3CHO</sub>                                                                  |
| f/i = 481.81 cm <sup>-1</sup>                                                       | f/i = 1473.83 cm <sup>-1</sup>                                                      | f/i = 1126.13 cm <sup>-1</sup>                                                      | f/i = 865.04 cm <sup>-1</sup>                                                        | f/i = 900.60 cm <sup>-1</sup>                                                         |
|  |  |                                                                                     |                                                                                      |                                                                                       |



|                                              |                                               |  |  |  |
|----------------------------------------------|-----------------------------------------------|--|--|--|
| $\text{TS}_{\text{CH}_3\text{CH}_2\text{O}}$ | $\text{TS}_{\text{CH}_3\text{CH}_2\text{OH}}$ |  |  |  |
| $f/i = 124.08 \text{ cm}^{-1}$               | $f/i = 752.13 \text{ cm}^{-1}$                |  |  |  |

**Figure S8** The structures of all transition state (TS) on Mo@K/MoS<sub>2</sub>(100) site with the related frequency data.

|                                                                                     |                                                                                     |                                                                                     |                                                                                     |                                                                                      |
|-------------------------------------------------------------------------------------|-------------------------------------------------------------------------------------|-------------------------------------------------------------------------------------|-------------------------------------------------------------------------------------|--------------------------------------------------------------------------------------|
| 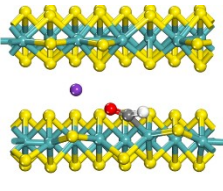   |    |    |   |   |
| $\text{TS}_{\text{H-CO}}$                                                           | $\text{TS}_{\text{CO-H}}$                                                           | $\text{TS}_{\text{H}_2\text{CO}}$                                                   | $\text{TS}_{\text{CH}_2\text{-O}}$                                                  | $\text{TS}_{\text{CH}_2\text{OH}}$                                                   |
| $f/i = 439.84 \text{ cm}^{-1}$                                                      | $f/i = 1855.12 \text{ cm}^{-1}$                                                     | $f/i = 606.98 \text{ cm}^{-1}$                                                      | $f/i = 370.13 \text{ cm}^{-1}$                                                      | $f/i = 965.33 \text{ cm}^{-1}$                                                       |
|   |   |   |  |  |
| $\text{TS}_{\text{H}_3\text{CO}}$                                                   | $\text{TS}_{\text{CH}_3\text{-O}}$                                                  | $\text{TS}_{\text{CH}_3\text{OH}}$                                                  | $\text{TS}_{\text{CH}_2\text{-OH}}$                                                 | $\text{TS}_{\text{CH}_3\text{-OH}}$                                                  |
| $f/i = 1039.23 \text{ cm}^{-1}$                                                     | $f/i = 542.90 \text{ cm}^{-1}$                                                      | $f/i = 810.42 \text{ cm}^{-1}$                                                      | $f/i = 418.53 \text{ cm}^{-1}$                                                      | $f/i = 469.30 \text{ cm}^{-1}$                                                       |
|  |  |  |                                                                                     |                                                                                      |
| $\text{TS}_{\text{CH}_2\text{-H}}$                                                  | $\text{TS}_{\text{CH}_3\text{-H}}$                                                  | $\text{TS}_{\text{H}_3\text{CO-H}}$                                                 |                                                                                     |                                                                                      |
| $f/i = 404.30 \text{ cm}^{-1}$                                                      | $f/i = 342.43 \text{ cm}^{-1}$                                                      | $f/i = 973.50 \text{ cm}^{-1}$                                                      |                                                                                     |                                                                                      |

**Figure S9** The structures of all transition state (TS) on S@K/MoS<sub>2</sub>(100) site with the related frequency data.
